# Supplementary material
Source: PubMed Central journal article supplement (PMC2944422)

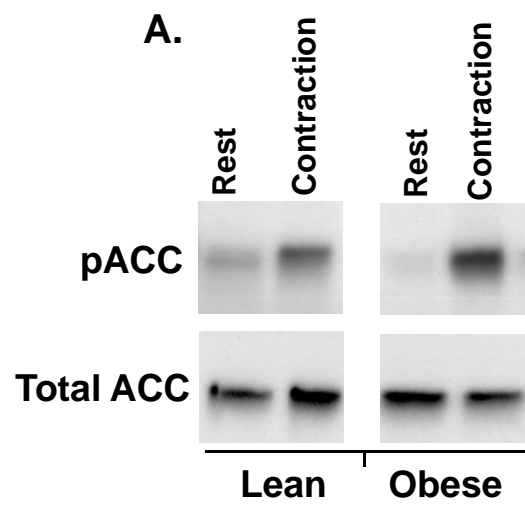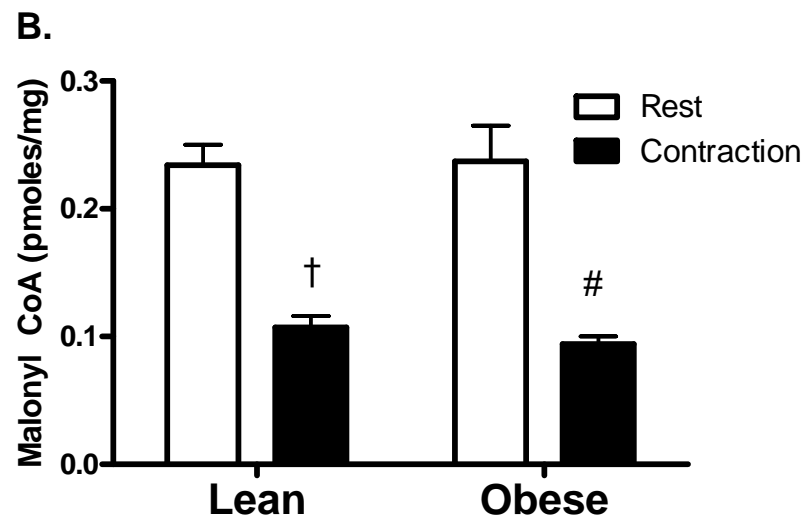

Supplement: 00093.2010_1.pdf [file 00093.2010_1.pdf]
